# Supplementary material
Source: MDPI journal article supplement (https://www.mdpi.com/2071-1050/13/21/11595)
Supplement: s1 [file s1]

Archive with 4 entries (4 files):
- Suplemmentary material S1.pdf
- Suplemmentary material S2.xlsx
- Suplemmentary material S3.pdf
- Suplemmentary material S4.xlsx
