# Supplementary material
Source: MDPI journal article supplement (https://www.mdpi.com/2071-1050/13/21/11595)
Supplement: s1 [file s1 › Suplemmentary material S1.pdf]

## Supplementary Material A

**Table A: Representative property of the region São José do Rio Preto.**

i. Qualitative characteristics

| Characteristics                     | Description                         |
|-------------------------------------|-------------------------------------|
| Total property area                 | 220 ha                              |
| Area used for sheep farming         | 15 ha                               |
| Land price                          | R\$20,000.00/ha                     |
| Soil fertility                      | Medium                              |
| Is sheep farming the only activity? | No                                  |
| Other activities developed          | Sugar cane                          |
| Sheep farming time                  | 4 years                             |
| Sheep farming administrator         | Owner                               |
| Sheep farming time                  | 5 days/month                        |
| Technical aid                       | Yes, 1day/month                     |
| Number of employees registered      | 1                                   |
| Number of matrices                  | 300                                 |
| Number of sires                     | 3                                   |
| Traded lambs/year                   | 343                                 |
| Herd stabilization                  | Yes                                 |
| Male replacement                    | Male Dorper x female woolless       |
| Female replacement                  | Itself                              |
| Male replacement                    | Purchase                            |
| Steps taken in the cycle            | Full cycle                          |
| Breeding system                     | Semi-finishing                      |
| Major station                       | Yes                                 |
| Pregnancy diagnosis                 | No                                  |
| Weaning procedure                   | Controlled breastfeeding            |
| Type of animal facilities           | Recycling of dairy cattle ranches   |
| Type of troughs used                | Recycling for other materials       |
| Tractor availability                | Yes, 75 cv                          |
| Implements and/or equipment         | Carriage, forage harvester, chopper |
| Pastures                            |                                     |
| Type                                | Tifton 85                           |
| farmed for sheep?                   | Yes                                 |
| Capacity                            | Need make the count                 |
| Does it rotate?                     | Yes                                 |
| Does it perform fertilization?      | Yes, limestone                      |
| Extra voluminous                    | Yes                                 |
| Type                                | Sugar cane                          |
| Origin                              | Itself                              |
| Concentrated                        | Yes                                 |

## Supplementary Material A

**Table A: Representative property of the region São José do Rio Preto.**

|        |                                             |
|--------|---------------------------------------------|
| Type   | Formulated                                  |
| Origin | Purchased ingredients, made on the property |

ii. Technical indicators of SJRP sheep production system

| Technical indicators       | Value |
|----------------------------|-------|
| Pregnancy rate (%)         | 85    |
| Prolificacy rate (%)       | 140   |
| Lambing interval (months)  | 11    |
| Birth weight (kg)          | 4     |
| Weaning age (days)         | 60    |
| Weaning weight (kg)        | 20    |
| Pre weaning ADG (kg/day)   | 0.267 |
| Pre weaning mortality (%)  | 12    |
| Slaughter live weight (kg) | 38    |
| Fattening days             | 70    |
| Slaughter age (days)       | 130   |
| Post weaning ADG (kg/day)  | 0.257 |
| Carcass yield (%)          | 48    |

iii. Scheme adopted for allocation of sheep production costs

| A. VARIABLE COST  |               |              |
|-------------------|---------------|--------------|
| Feed              | R\$           | US\$         |
| <u>Lamb</u>       |               |              |
| Mineral salt      | R\$ 1,760.68  | \$ 454.96    |
| Sugar cane silage | R\$ 4,874.75  | \$ 1,259.62  |
| Soybean Meal      | R\$ 14,055.41 | \$ 3,631.89  |
| Ground Corn       | R\$ 12,057.51 | \$ 3,115.64  |
| <u>Ewes</u>       |               |              |
| Mineral salt      | R\$ 6,522.22  | \$ 1,685.33  |
| Forages           | R\$ 25,575.21 | \$ 6,608.58  |
| Sugar cane silage | R\$ 7,101.58  | \$ 1,835.03  |
| Soybean Meal      | R\$ 6,643.84  | \$ 1,716.75  |
| Ground Corn       | R\$ 2,533.09  | \$ 654.55    |
| <u>Ram</u>        |               |              |
| Mineral salt      | R\$ 81.53     | \$ 21.07     |
| Forages           | R\$ 505.14    | \$ 130.53    |
| Sugar cane silage | R\$ 117.08    | \$ 30.25     |
| Subtotal - Feed   | R\$ 81,828.03 | \$ 21,144.19 |

## Supplementary Material A

**Table A: Representative property of the region São José do Rio Preto.**

|                                       |                      |                     |
|---------------------------------------|----------------------|---------------------|
| <i>Veterinary expenses</i>            |                      |                     |
| <u>Lamb</u>                           |                      |                     |
| Anthelmintic                          | R\$ 37.39            | \$ 9.66             |
| Vaccines                              | R\$ 957.12           | \$ 247.32           |
| - <u>Ewes</u>                         |                      |                     |
| Anthelmintic                          | R\$ 98.18            | \$ 25.37            |
| Vaccines                              | R\$ 418.91           | \$ 108.25           |
| - <u>Ram</u>                          |                      |                     |
| Anthelmintic                          | R\$ 1.96             | \$ 0.51             |
| Vaccines                              | R\$ 4.19             | \$ 1.08             |
| <i>Subtotal - Veterinary expenses</i> | <i>R\$ 1,517.75</i>  | <i>\$ 392.18</i>    |
| <i>SUBTOTAL - VARIABLE COSTS</i>      | <i>R\$ 83,345.79</i> | <i>\$ 21,536.38</i> |
| <b>B. FIXED OPERATING COSTS</b>       |                      |                     |
| <u>Manpower</u>                       |                      |                     |
| Fixes                                 | R\$ 9,120.00         | \$ 2,356.59         |
| Wage workers                          | R\$ 10,200.00        | \$ 2,635.66         |
| Social charges                        | R\$ 200.00           | \$ 51.68            |
| Services (Technical assistance)       | R\$ 180.00           | \$ 46.51            |
| <i>Subtotal - Manpower</i>            | <i>R\$ 19,700.00</i> | <i>\$ 5,090.44</i>  |
| <u>Energy and fuels</u>               |                      |                     |
| Fuel (except pasture maintenance)     | R\$ 404.40           | \$ 104.50           |
| Electricity                           | R\$ 1,224.00         | \$ 316.28           |
| <i>Subtotal - Energy and fuels</i>    | <i>R\$ 1,628.40</i>  | <i>\$ 420.78</i>    |
| <u>Depreciations</u>                  |                      |                     |
| Housing                               | R\$ 2,325.59         | \$ 600.93           |
| Purchased rams                        | R\$ 197.92           | \$ 51.14            |
| <u>Machinery and implements</u>       |                      |                     |
| Tractor                               | R\$ 327.93           | \$ 84.74            |
| 4-wheel trailer                       | R\$ 236.18           | \$ 61.03            |
| Forage Harvester                      | R\$ 310.07           | \$ 80.12            |
| Weighing machine                      | R\$ 33.91            | \$ 8.76             |
| <i>Subtotal - Depreciations</i>       | <i>R\$ 3,431.61</i>  | <i>\$ 886.72</i>    |
| <u>Maintenance and conservation</u>   |                      |                     |
| <u>Machinery and implements</u>       |                      |                     |
| Tractor                               | R\$ 121.84           | \$ 31.48            |
| 4-wheel trailer                       | R\$ 87.75            | \$ 22.67            |
| Forage Harvester                      | R\$ 115.20           | \$ 29.77            |
| <u>Facilities</u>                     |                      |                     |
| Housing                               | R\$ 691.08           | \$ 178.57           |
| Fences                                | R\$ 378.00           | \$ 97.67            |

## Supplementary Material A

**Table A: Representative property of the region São José do Rio Preto.**

|                                            |                       |                     |
|--------------------------------------------|-----------------------|---------------------|
| Pastures                                   |                       |                     |
| Limestone                                  | R\$ 10,275.00         | \$ 2,655.04         |
| fertilizers                                | R\$ 2,000.00          | \$ 516.80           |
| <i>Subtotal - Machinery and implements</i> | R\$ 13,668.87         | \$ 3,532.01         |
| Others fixed costs                         |                       |                     |
| Taxes charges                              | R\$ 400.00            | \$ 103.36           |
| <i>Subtotal - Others fixed costs</i>       | R\$ 400.00            | \$ 103.36           |
| <i>SUBTOTAL - FIXED OPERATING COSTS</i>    | <i>R\$ 38,828.88</i>  | <i>\$ 10,033.30</i> |
| C. OPERATING COST (A + B)                  |                       |                     |
| <i>Subtotal - Operating cost</i>           | <i>R\$ 122,174.66</i> | <i>\$ 31,569.68</i> |
| D. INCOME OF FACTORS                       |                       |                     |
| Remuneration on fixed capital              |                       |                     |
| Remuneration on capital - facilities       | R\$ 1,400.00          | \$ 361.76           |
| Remuneration on capital - equipment        | R\$ 3,193.04          | \$ 825.07           |
| Remuneration on capital - breeders         | R\$ 477.00            | \$ 123.26           |
| Land (opportunity cost of lease)           | R\$ 4,460.34          | \$ 1,152.54         |
| <i>Subtotal - Income of factors</i>        | <i>R\$ 9,530.38</i>   | <i>\$ 2,462.63</i>  |
| E. TOTAL COST (C + D)                      | R\$ 131,705.04        | \$ 34,032.31        |

The rate of change in carrying out this study was R\$ 3.87 per US\$ 1.00

## References

- ICPC - Índice de Custo de Produção do Cordeiro Paulista, 2019. Informativo mensal do índice de custo de produção do cordeiro paulista. Available at. <https://www.lae-fmvz-usp.com/informativos-mensais>. Access in: 11 nov. 2019.
- Raineri, C., Nunes, B.C.P., Gameiro, A.H., 2015a. Technological characterization of sheep production systems in Brazil. Anim. Sci. J. 86, 476–485. <https://doi.org/10.1111/asj.12313>.
- Raineri, C., Stivari, T.S.S., Gameiro, A.H., 2015b. Development of a cost calculation model and cost index for sheep production. Rev. Bras. Zootec. 44, 443–455.

## **Supplementary Material A**

**Table A: Representative property of the region São José do Rio Preto.**

<https://doi.org/10.1590/S1806-92902015001200005>.
