# Supplementary material
Source: MDPI journal article supplement (https://www.mdpi.com/2071-1050/13/21/11595)
Supplement: s1 [file s1 › Suplemmentary material S2.xlsx]

## Sheet: Emergy
Table B. Emergy evaluation of fully sheep (SJRP) system
Note		Item		Data			Unit		UEV		Solar				PR		PN		Em$	% Total
				(units·yr-1)					(sej·unit-1)		EMERGY				%		%		Value	Emergy		Em$	3146400000000
											(sej/yr)								(2019 $.yr)
RENEWABLE RESOURCES (R)
1		Sun		2553444000000			J		1		2553444000000				1	2553444000000	0		0.811545	0.00191382
2		Wind		1.38444e+11			J		1859		2.57367e+14				1	2.57367e+14	0		81.7972	0.192897
3		Rain		1028952000000			J		23500		2.41804e+16				1	2.41804e+16	0		7685.09	18.1233
4		Et		259656000			J		25900		6725090400000				1	6725090400000	0		2.13739	0.00504048
		Sum of free reneweble inputs									2.41804e+16				1	2.41804e+16			7769.84	18.1233
NONRENEWABLE STORAGES (N)
5		Net Topsoil Loss		542505600			J		243000		131828860800000				0	0	131828860800000		41.8983	0.0988062
		Sum of free inputs (R+N) (sun, wind, Et omitted)									2.43122e+16						131828860800000		7726.99	18.2221
PURCHASED INPUTS (P)
6		Tifton-85		689183040000			J		19100		1.31634e+16				0.7	9214377244800000	3949018819200000		4183.64	9.86601
7		Forage Sugar Cane – lamb		45327			kg		85880000000		3892682760000000				0.19	739609724400000	3153073035600000		1237.19	2.91758
8		Forage Sugar Cane – ewes		86247.3			kg		85880000000		7406922417999999				0.19	1.40732e+15	5999607158579999		2354.09	5.55151
9		Forage Sugar Cane – rams		1243.62			kg		85880000000		1.06802e+14				0.19	2.02924e+13	8.65097e+13		33.9442	0.0800485
10		Limestone		45000			kg		7227600000		325242000000000				0	0	325242000000000		103.37	0.24377
11		Rams		1231186320			J		1993900		2454862403448000				0.5	1227431201724000	1227431201724000		780.213	1.83993
12		Mineral salt – lamb		564			kg		1520000000000		857280000000000				0	0	857280000000000		272.464	0.642534
13		Mineral salt – ewes		2730.28			kg		1520000000000		4.15003e+15				0	0	4.15003e+15		1318.98	3.11046
14		Mineral salt – rams		29.85			kg		1520000000000		45372000000000				0	0	45372000000000		14.4203	0.0340065
15		Corn kg/year – ewes		2946000			g		978000000		2881188000000000				0.17	4.89802e+14	2391386040000000		915.709	2.15946
16		Soybean kg/year – ewes		4419000			g		2080000000		9191520000000000				0.17	1562558400000000	7628961600000000		2921.28	6.88908
17		Corn kg/year – lamb		14032130			g		978000000		1.37234e+16				0.17	2332981933800000	1.13904e+16		4361.63	10.2858
18		Soybean kg/year – lamb		9353610			g		2080000000		1.94555e+16				0.17	3307436496000000	1.61481e+16		6183.42	14.582
19		Anthelmintics – lamb		747.74			g		3575000000		2.67317e+12				0	0	2.67317e+12		0.849597	0.00200355
20		Anthelmintics – ewes		1965			g		3575000000		7024875000000				0	0	7024875000000		2.23267	0.00526517
21		Anthelmintics -rams		39.27			g		3575000000		140390250000				0	0	140390250000		0.0446193	0.000105223
22		Vaccine – lamb		686			g		3575000000		2452450000000				0	0	2452450000000		0.779446	0.00183812
23		Vaccine – ewes		327			g		3575000000		1169025000000				0	0	1169025000000		0.371544	0.000876188
24		Vaccine – rams		3.27			g		3575000000		1.16903e+10				0	0	1.16903e+10		0.00371544	8.76188e-06
25		Wire		19.05			kg		10100000000000		192405000000000				0	0	192405000000000		61.1508	0.144208
26		Diesel fuel		3768000000			J		85573.8		322442078400000				0	0	322442078400000		102.48	0.241671
27		Electric Power		8640000000			J		191520		1654732800000000				0.68	1.12522e+15	5.29514e+14		525.913	1.24023
											7.98373e+16					2.1427e+16	5.84103e+16		32346	59.8383
SERVICES (S)
28		Depreciation Steel machines		40.95			kg		10100000000000		413595000000000				0	0	413595000000000		131.45	0.309991
29		Depreciation Steel equip.		102.6			kg		10100000000000		1036260000000000				0	0	1036260000000000		329.348	0.77668
30		Depreciation Facilities		896.078			U$		3146400000000		2819418306976744				0	0	2819418306976744		896.078	2.11316
31		Maintenance		268.357			U$		3146400000000		8.44357e+14				0	0	8.44357e+14		268.357	0.632849
32		Daily labor		1255800000			J		2128000		2672342400000000				0.22	587915328000000	2084427072000000		849.333	2.00293
33		Registered Labor		1381380000			J		5745600		7936856928000000				0.66	5238325572480000	2698531355520000		2522.52	5.9487
34		Technical Assistance		251160000			J		7068000		1775198880000000				0.22	390543753600000	1384655126400000		564.2	1.33052
35		Owner Labor		627900000			J		7068000		4437997200000000				0.05	221899860000000	4216097340000000		1410.5	3.32629
35		Social charges		777.202			U$		3146400000000		2.44539e+15				0.66	1613956476683938	8.31432e+14		777.202	1.83283
36		Financial charges		1554.4			U$		3146400000000		4890777202072539				0	0	4890777202072539		1554.4	3.66565
		Sum of labor and services									2.92722e+16					8052640990763938	2.12196e+16		9303.39	21.9396
INCOMES
37		Selling lambs		452298			U$
38		Selling ewes		53149.9			U$
39		Sellings rams		9416.86			U$
		Sum of total sales		452298			U$
OUTPUTS (Y) and TRANSFORMITIES (calculated)				Outputs			Unit		UEV		Total Emergy
				(units·yr-1)					(sej·unit-1)		(sej/yr)
		With labor and services
41		Live lamb production		13034000			g		1.02364e+10
42		Lamb meat production		3037918840320			J		43918.8		1.33422e+17
		Without labor and services
43		Live lamb production		13034000			g		7.9906e+09
44		Lamb meat production		3037918840320			J		34283.2		1.04149e+17
INDEXES, calculated from Y without services
		Name of Index							Expression			Quantity
		Emergy Yield Ratio (EYR)							Y/(PN)			1.78307
		Environmental Loading Ratio (ELR)							(N + PN)/ (R+PR)			1.28361
		Emergy Sustainability Index (ESI)							EYR/ELR			1.38911
		Emergy Investment Ratio (EIR)							(P)/(R + N)			3.28384
		Emergy Exchange Ratio (EER)							Y/(U$*[sej/U$])			0.0731844
		% Renewability (% Ren)							(R + PR) /Y			0.437903
		UEV (seJ/J)							Y/EP			34283.2
		Empower density (sej/ha)							Y/area			6943298507416533
INDEXES, calculated from Y with services
		Name of Index							Expression			Quantity
		Emergy Yield Ratio (EYR)							Y/(PN)			1.67552
		Environmental Loading Ratio (ELR)							(N + PN)/ (R+PR)			1.48643
		Emergy Sustainability Index (ESI)							EYR/ELR			1.12722
		Emergy Investment Ratio (EIR)							(P+S)/(R + N)			4.48785
		Emergy Exchange Ratio (EER)							Y/(U$*[sej/U$])			0.0937536
		% Renewability (% Ren)							(R + PR) /Y			0.402184
		UEV (seJ/J)							Y/EP			43918.8
		Empower density (sej/ha)							Y/area			8894777953428438
Notes, Table A.1
All UEVs are based on the current standard global emergy flow (12E+24 seJ/yr) calculated by Brown et al., 2016. See in notes those ones that have been normalized from the: i) 1996 solar empower baseline (9.44E24 seJ/yr) multiplying by 1,27 (the ratio 12.00/9.44); ii) 2000 solar empower baseline (15.83E+24 seJ/yr) multiplying by 0,76 ( the ratio 15.83/12.00).
1	Sun insolation, J												Factor to normalized GEB	References
	Annual energy =		(Area)(Avg. Total Annual Insolation)(1-Albedo)
	Area:		150000		m²
	Insolation:		5.55		kwh·m²·yr
	Convertion:		3600000		kwh to J
	Albedo:		0.148		%
	Energy flow=		2553444000000		J·ano
	UEV=		1		sej·J-1									ODUM, H.T.. Environmental Accounting, EMERGY and Decision Making. John Wiley, New York, 370 pp. 1996.
2	Wind, J
	Annual energy =		(Area)(Air density)(Drag coefficient)(Geostrophic wind velocity^3)(seconds in the system)
	Area:		150000		m2
	Density of Air:		1.2		kg·m-3
	Avg. annual wind velocity:		1.74		m·s-1
	Geostrophic wind:		2.9		m·s-1
	Drag coefficient:		0.001
	Seconds in the system		31536000
	Annual energy =		1.38444e+11		J·yr-1
	UEV =		1859		sej·J-0								0.76	ODUM, H.T., BROWN, M.T., BRANDT-WILLIAMS, S.L. Handbook of Emergy Evaluation: A Compendium of Data for Emergy Computation Issued in a Series of Folios. Folio no 1 - Introduction and Global Budget. 2000. Center for Environmental Policy, Environmental Engineering Sciences, Univ. of Florida, Gainesville, 17 pp.
3	Rain chemical potential energy, J
	Annual energy =		(Area)(Rainfall)(Gibbs free energy of rainwater 4.94J/g*Conversion factor of density of water 1E6g/m3)
	Area:		150000		m2
	Rainfall:		1383		l.·m-2·yr-1
	Gibbs free energy of rainwater		4960
	Density of Water		1
	Annual energy =		1028952000000		J·yr-1
	UEV =		23500		sej·J-1								0.76	ODUM, H.T., BROWN, M.T., BRANDT-WILLIAMS, S.L. Handbook of Emergy Evaluation: A Compendium of Data for Emergy Computation Issued in a Series of Folios. Folio no 1 - Introduction and Global Budget. 2000. Center for Environmental Policy, Environmental Engineering Sciences, Univ. of Florida, Gainesville, 17 pp.
4	Evapotranspiration, J
	Annual energy =		(Area)(ETR)(Gibbs free energy of rainwater 4.94J/g*Conversion factor of density of water1E6g/m3)
	Area:		150000		m2
	ETR:		0.349		m3·m-2·yr-1
	Gibbs free energy of rainwater		4960
	Density of Water		1
	Annual energy =		259656000		J·yr-1
	UEV =		25900		sej·J-1								1.27	ODUM, H.T.. Environmental Accounting, EMERGY and Decision Making. John Wiley, New York, 370 pp. 1996.
5	Net Topsoil Loss, J
	Annual energy =		Energy loss in topsoil organic matter = (farmed area)(erosion rate)(%organic in soil)(energy of organic 5.4 kcal/g)(4186 J/kcal)
	Area:		150000		m2
	Erosion rate:		0.008		kg·m²·yr
	% organic in soil:		0.02
	Annual energy =		542505600		J
	UEV =		243000		sej/J								1.27	COHEN, M. J.; BROWN, M. T.; SHEPERD, K. D. Estimating the environmental costs of soil erosion at multiple scales in Kenya using emergy synthesis. Agricultural Ecosystems & Environment, v. 114, p. 249-269, 2006. http://dx.doi.org/10.1016/j.agee.2005.10.021
6	Tifton-85, J
	Annual energy =		(kg m²)(lifespan years)(energy of organic 0.56kcal/g)(4900)(4186 J/kcal)
	Mass:		3000		Kg m² yr¹
	Lifespan:		20		yr¹
	Annual energy =		689183040000		J
	UEV =		19100		sej/J								1.27	G.C. Rótolo, T. Rydberg, G. Lieblein, C. Francis, Emergy evaluation of grazing cattle in Argentina's Pampas, Agriculture, Ecosystems & Environment, Volume 119, Issues 3–4, 2007, Pages 383-395, ISSN 0167-8809, https://doi.org/10.1016/j.agee.2006.08.011
			689183040000
7	Forage Sugar Cane – lamb, kg
	Annual consumption:		(consumption of forage yr)(nº pers)
	Average per capita consumption:		151.09		kg
	nº lambs		300		lambs·yr
	Annual consumption:		45327		kg·yr-1
	UEV =		85880000000		sej·kg-1									Ometto, A.R., Roma, W., Ortega, E., (2004). Emergy life cycle assessment of fuel ethanol in Brazil: in Ortega, E. Ulgiati, S. (editors): Proceedings of IV Biennial International workshop “Advances in Energy Studies,” Unicamp, Campinas, SP. Brazil.
	Renewable fraction:		0.19		%
8	Forage Sugar Cane – ewes, kg
	Annual consumption:		(consumption of forage yr)(nº pers)
	Average per capita consumption:		251.45		kg
	nº ewes		343		ewes·yr
	Annual consumption:		86247.3		kg·yr-1
	UEV =		85880000000		sej·kg-1									Ometto, A.R., Roma, W., Ortega, E., (2004). Emergy life cycle assessment of fuel ethanol in Brazil: in Ortega, E. Ulgiati, S. (editors): Proceedings of IV Biennial International workshop “Advances in Energy Studies,” Unicamp, Campinas, SP. Brazil.
	Renewable fraction		0.19		%
9	Forage Sugar Cane – rams, kg
	Annual consumption:		(consumption of forage yr)(nº pers)
	Average per capita consumption:		414.54		kg
	nº rams		3		ewes·yr
	Annual consumption:		1243.62		kg·yr-1
	UEV =		85880000000		sej·kg-1									Ometto, A.R., Roma, W., Ortega, E., (2004). Emergy life cycle assessment of fuel ethanol in Brazil: in Ortega, E. Ulgiati, S. (editors): Proceedings of IV Biennial International workshop “Advances in Energy Studies,” Unicamp, Campinas, SP. Brazil.
	Renewable fraction		0.19		%
10	Limestone, kg
	Annual consumption:		45000		kg·yr-1
	UEV =		7227600000		sej·kg-1								0.76	Carlos Cezar Da Silva, Igor Corsini, Kátia Tagliaferro, Geslaine Frimaio, Cecília M. V. B. Almeida, Adrielle Frimaio e Silvia H. Bonilla. Environmental Accounting of Limestone Rock Processing for Agricultural Use. In … Brown, M.T., S. Sweeney, D.E. Campbell, S. Huang, D. Kang, T. Rydberg, D. Tilley and S. Ulgiati (eds). 2013. Emergy Synthesis 7: Theory and Applications of the Emergy Methodology. …
	Renewable fraction		0.02		%
11	Rams, J
	Annual energy =		(nº rams/lifespam)(weight per unit)(convertion factor kg/kcal)
	nº rams		1		unit·yr-1
	Avarege weight		120		kg
	Annual energy =		1231186320		J
	UEV =		1993900	1993900	sej/J								1.27	ODUM, H.T.. Environmental Accounting, EMERGY and Decision Making. John Wiley, New York, 370 pp. 1996.
	Renewable fraction		0.02		%
12	Mineral salt – lamb, kg
	Annual consumption:		564		kg·yr-1
	UEV =		1520000000000		sej·J-1								0.76	ORTEGA, E.. Comparação dos Balanços de Emergia de 2 Sistemas de Produção de Leite. In: Enrique Ortega; Vitor Comar; Paul Safonov. (Org.). Engenharia Ecológica e Agricultura Sustentável. 1ed.São Paulo: Annalume, 2:122, 2001.
	Renewable fraction		0.47		%
13	Mineral salt – ewes, kg
	Annual energy =		2730.28		kg·yr-1
	UEV =		1520000000000		sej·J-1								0.76	ORTEGA, E.. Comparação dos Balanços de Emergia de 2 Sistemas de Produção de Leite. In: Enrique Ortega; Vitor Comar; Paul Safonov. (Org.). Engenharia Ecológica e Agricultura Sustentável. 1ed.São Paulo: Annalume, 2:122, 2001.
	Renewable fraction		0.47		%
14	Mineral salt – rams, kg
	Annual consumption:		29.85		kg·yr-1
	UEV =		1520000000000		sej·J-1								0.76	ORTEGA, E.. Comparação dos Balanços de Emergia de 2 Sistemas de Produção de Leite. In: Enrique Ortega; Vitor Comar; Paul Safonov. (Org.). Engenharia Ecológica e Agricultura Sustentável. 1ed.São Paulo: Annalume, 2:122, 2001.
	Renewable fraction		0.47		%
15	Corn – ewes, g
	Annual consumption:		2946000		g ·yr-1
	UEV =		978000000		sej·g-1								0.76	Ortega, E., Anami, M., Diniz, G., 2002. Certification of food products using emergy analysis. In: Proceedings of IIIrd Internacional Workshop Advances in Energy Studies, Porto Venere, Italy. 227-237.
	Renewable fraction		0.17		%
16	Soyabean – ewes, g
	Annual consumption:		4419000		g ·yr-1
	UEV =		2080000000		sej·g-1								0.76	Ortega, E., Anami, M., Diniz, G., 2002. Certification of food products using emergy analysis. In: Proceedings of IIIrd Internacional Workshop Advances in Energy Studies, Porto Venere, Italy. 227-237.
	Renewable fraction		0.17		%
17	Corn – lambs, g
	Annual consumption:		14032130		g ·yr-1
	UEV =		978000000		sej·g-1								0.76	Ortega, E., Anami, M., Diniz, G., 2002. Certification of food products using emergy analysis. In: Proceedings of IIIrd Internacional Workshop Advances in Energy Studies, Porto Venere, Italy. 227-237.
	Renewable fraction		0.17		%
18	Soyabean – lambs, g
	Annual consumption:		9353610		g ·yr-1
	UEV =		2080000000		sej·g-1								0.76	Ortega, E., Anami, M., Diniz, G., 2002. Certification of food products using emergy analysis. In: Proceedings of IIIrd Internacional Workshop Advances in Energy Studies, Porto Venere, Italy. 227-237.
	Renewable fraction		0.17		%
19	Anthelmintics – lamb, g
	Annual consumption:		747.74		g ·yr-1
	UEV =		3575000000		sej·g-1									Campbell, D. E., & Ohrt, A. (2009) Environmental accounting using emergy: evaluation of Minnesota. US Environmental Protection Agency, Office of Research and Development, National Health and Environmental Effects Research Laboratory, Atlantic Ecology Division.
	Renewable fraction		0.01		%
20	Anthelmintics – ewes, g
	Annual consumption:		1965		g ·yr-1
	UEV =		3575000000		sej·g-1									Campbell, D. E., & Ohrt, A. (2009) Environmental accounting using emergy: evaluation of Minnesota. US Environmental Protection Agency, Office of Research and Development, National Health and Environmental Effects Research Laboratory, Atlantic Ecology Division.
	Renewable fraction		0.01		%
21	Anthelmintics – rams, g
	Annual consumption:		39.27		g ·yr-1
	UEV =		3575000000		sej·g-1									Campbell, D. E., & Ohrt, A. (2009) Environmental accounting using emergy: evaluation of Minnesota. US Environmental Protection Agency, Office of Research and Development, National Health and Environmental Effects Research Laboratory, Atlantic Ecology Division.
	Renewable fraction		0.01		%
22	Vaccine – lamb, g
	Annual consumption:		686		g ·yr-1
	UEV =		3575000000		sej·g-1									Campbell, D. E., & Ohrt, A. (2009) Environmental accounting using emergy: evaluation of Minnesota. US Environmental Protection Agency, Office of Research and Development, National Health and Environmental Effects Research Laboratory, Atlantic Ecology Division.
	Renewable fraction		0.01		%
23	Vaccine – ewes, g
	Annual consumption:		327		g ·yr-1
	UEV =		3575000000		sej·g-1									Campbell, D. E., & Ohrt, A. (2009) Environmental accounting using emergy: evaluation of Minnesota. US Environmental Protection Agency, Office of Research and Development, National Health and Environmental Effects Research Laboratory, Atlantic Ecology Division.
	Renewable fraction		0.01		%
24	Vaccine – rams, g
	Annual consumption:		3.27		g ·yr-1
	UEV =		3575000000		sej·g-1									Campbell, D. E., & Ohrt, A. (2009) Environmental accounting using emergy: evaluation of Minnesota. US Environmental Protection Agency, Office of Research and Development, National Health and Environmental Effects Research Laboratory, Atlantic Ecology Division.
	Renewable fraction		0.01		%
25	Wire, kg
	Annual consumption:		19.05		kg ·yr-1
	UEV =		10100000000000		sej·kg-1									Ulgiati, S., Odum, H. T., Bastianoni, S. (1994) Emergy use, environmental loading and sustainability. An emergy analysis of Italy. Ecol Modell 73:215-268. doi: 10.1016/0304-3800(94)90064-7
	Renewable fraction		0.01		%
26	Diesel fuel, J
	Annual energy =		(Volume*convertion factor)
		Volume=	120		liters
		Convertion factor l to J	31400000		liters to J
		Annual energy=	3768000000		J
	UEV =		85573.8		sej·g-1									Bastiannoni, S.; Campbell, D.E.; Ridolfi, R.; Pulselli, F.M. The solar transformity of petroleum fuels. Ecol. Model. 2009, 220, 40–50
	Renewable fraction		0.01		%
27	Electricity, J
	Annual energy =		(Consumption*3.6E6 J/KWh)
	Consumption:		2400		KWh
	Convertion factor:		3600000		kwh to J
	Annual energy =		8640000000		J
	UEV =		191520		sej/J									BRANDT-WILLIAMS, S. L. Handbook of Emergy Evaluation: A Compendium of Data for Emergy Computation Issued in a Series of Folios. 2002. Folio no4 - Emergy of Florida Agriculture. Center for Environmental Policy, Environmental Engineering Sciences, Univ. of Florida, Gainesville, 40p. Disponível em: <http://www.ees.ufl.edu/cep/>.
	Renewable fraction:		0.35		%
28	Depreciation Steel machines, kg
	Annual consumption=		(hours of use)(total weight of tractor)/(lifespan)
	Tractor MF 4275 (2730kg)		180		hours of use
	Lifespan:		12000		hours
	Weight		2730		kg
	Annual consumption:		40.95		kg yr
	UEV		10100000000000		sej kg									Ulgiati, S., Odum, H. T., Bastianoni, S. (1994) Emergy use, environmental loading and sustainability. An emergy analysis of Italy. Ecol Modell 73:215-268. doi: 10.1016/0304-3800(94)90064-7
	Renewable fraction:		0.01		%
29	Depreciation Steel implements, kg
	Annual consumption=		(hours of use)(total weight of tractor)/(lifespan)
	Truck for tractor		180		hours of use
	Lifespan:		4000		hours
	Weight		432		kg
	Annual consumption:		19.44		kg yr
	UEV		10100000000000		sej kg									Biagio F. Giannetti, Feni Agostinho, Luciano C. Moraes, Cecília M.V.B. Almeida, Sergio Ulgiati. Multicriteria cost–benefit assessment of tannery production: The need for breakthrough process alternatives beyond conventional technology optimization. Environmental Impact Assessment Review 54 (2015) 22–38.
	Renewable fraction:		0.01		%
30	Forage Harvester		180		hours of use
	Lifespan:		500		hours
	Weight		195		kg
	Annual consumption:		70.2		kg yr
	UEV		10100000000000		sej kg									Biagio F. Giannetti, Feni Agostinho, Luciano C. Moraes, Cecília M.V.B. Almeida, Sergio Ulgiati. Multicriteria cost–benefit assessment of tannery production: The need for breakthrough process alternatives beyond conventional technology optimization. Environmental Impact Assessment Review 54 (2015) 22–38.
	Renewable fraction:		0.01		%
31	Animal Scale		36		hours of use
	Lifespan:		500		hours
	Weight		180		kg
	Annual consumption:		12.96		kg yr
	UEV		10100000000000		sej kg									Biagio F. Giannetti, Feni Agostinho, Luciano C. Moraes, Cecília M.V.B. Almeida, Sergio Ulgiati. Multicriteria cost–benefit assessment of tannery production: The need for breakthrough process alternatives beyond conventional technology optimization. Environmental Impact Assessment Review 54 (2015) 22–38.
	Renewable fraction:		0.01		%
32	Depreciation Infraestructure, U$
	Annual consumption=		(price of facilities depreciation)/(exchange rate)
	Facillities		3467.82		hours of use
	exchange rate:		3.87		R$ to U$
	Annual consumption:		896.078		U$ yr
	UEV		3146400000000		sej U$									Biagio F. Giannetti, Feni Agostinho, Luciano C. Moraes, Cecília M.V.B. Almeida, Sergio Ulgiati. Multicriteria cost–benefit assessment of tannery production: The need for breakthrough process alternatives beyond conventional technology optimization. Environmental Impact Assessment Review 54 (2015) 22–38.
	Renewable fraction:		0		%
33	Maintenance, U$
	Annual consumption=		(price of facilities depreciation)/(exchange rate)
	Facillities		1038.54
	exchange rate:		3.87		R$ to U$
	Annual consumption:		268.357		U$ yr
	UEV		3146400000000		sej U$									Biagio F. Giannetti, Feni Agostinho, Luciano C. Moraes, Cecília M.V.B. Almeida, Sergio Ulgiati. Multicriteria cost–benefit assessment of tannery production: The need for breakthrough process alternatives beyond conventional technology optimization. Environmental Impact Assessment Review 54 (2015) 22–38.
	Renewable fraction:		0		%
34	Daily Labor, J
	Annual energy =		(men-day/yr)*(2500 kcal/day)*(4186J/Cal)
	work days:		120		day
	Metabolism / work - day		2500		day to kcal
	Convertion factor:		4186		kcal to J
	Annual energy =		1255800000		J·yr-1
	UEV =		2128000		sej·J-1									Brown, M.T., 2003. Resource imperialism: Emergy perspectives on sustainability, international trade, and balancing the welfare of nations, pp. 135-149. In: Ulgiati, S, Brown, MT, Giampietro, M, Herendeen, R.A., Mayumi, K (eds) 3rd Biennial workshop, Advances in Emergy Studies, Reconsidering the Importance of Energy. SGEditoriali, Padova, Italy.
35	Registered Labor , J
	Annual energy =		(men-day/yr)*(2500 kcal/day)*(4186J/Cal)
	work days:		132		day
	Metabolism / work - day		2500		day to kcal
	Convertion factor:		4186		kcal to J
	Annual energy =		1381380000		J·yr-1
	UEV =		5745600		sej·J-1									Brown, M.T., 2003. Resource imperialism: Emergy perspectives on sustainability, international trade, and balancing the welfare of nations, pp. 135-149. In: Ulgiati, S, Brown, MT, Giampietro, M, Herendeen, R.A., Mayumi, K (eds) 3rd Biennial workshop, Advances in Emergy Studies, Reconsidering the Importance of Energy. SGEditoriali, Padova, Italy.
36	Technical Assistance , J
	Annual energy =		(men-day/yr)*(2500 kcal/day)*(4186J/Cal)
	work days:		24		day
	Metabolism / work - day		2500		day to kcal
	Convertion factor:		4186		kcal to J
	Annual energy =		251160000		J·yr-1
	UEV =		7068000		sej·J-1									Brown, M.T., 2003. Resource imperialism: Emergy perspectives on sustainability, international trade, and balancing the welfare of nations, pp. 135-149. In: Ulgiati, S, Brown, MT, Giampietro, M, Herendeen, R.A., Mayumi, K (eds) 3rd Biennial workshop, Advances in Emergy Studies, Reconsidering the Importance of Energy. SGEditoriali, Padova, Italy.
37	Owner Labor , J
	Annual energy =		(men-day/yr)*(2500 kcal/day)*(4186J/Cal)
	work days:		60		day
	Metabolism / work - day		2500		day to kcal
	Convertion factor:		4186		kcal to J
	Annual energy =		627900000		J·yr-1
	UEV =		7068000		sej·J-1									Brown, M.T., 2003. Resource imperialism: Emergy perspectives on sustainability, international trade, and balancing the welfare of nations, pp. 135-149. In: Ulgiati, S, Brown, MT, Giampietro, M, Herendeen, R.A., Mayumi, K (eds) 3rd Biennial workshop, Advances in Emergy Studies, Reconsidering the Importance of Energy. SGEditoriali, Padova, Italy.
38	Social charges, U$
	Annual cost of services:		(Cost)(convertion factor real to U$)
	Cost:		3000		R$·yr-1
	Convertion factor:		3.86		R$ to U$
	Annual cost of services:		777.202		U$·yr-2
	UEV =		3146400000000		sej·U$-1									Brown, M.T., 2003. Resource imperialism: Emergy perspectives on sustainability, international trade, and balancing the welfare of nations, pp. 135-149. In: Ulgiati, S, Brown, MT, Giampietro, M, Herendeen, R.A., Mayumi, K (eds) 3rd Biennial workshop, Advances in Emergy Studies, Reconsidering the Importance of Energy. SGEditoriali, Padova, Italy.
39	Financial charges, U$
	Annual cost of services:		(Cost)(convertion factor real to U$)
	Cost:		6000		R$·yr-1
	Convertion factor:		3.86		R$ to U$
	Annual cost of services:		1554.4		U$·yr-2
	UEV =		3146400000000		sej·U$-1									Brown, M.T., 2003. Resource imperialism: Emergy perspectives on sustainability, international trade, and balancing the welfare of nations, pp. 135-149. In: Ulgiati, S, Brown, MT, Giampietro, M, Herendeen, R.A., Mayumi, K (eds) 3rd Biennial workshop, Advances in Emergy Studies, Reconsidering the Importance of Energy. SGEditoriali, Padova, Italy.
40	Selling lambs, U$
	Annual incomes =		(lambs sold)(avarege weight)(average price)
	lambs sold:		343
	avarage weight:		38		kg
	avarage price:		8.99		R$/kg
	Convertion factor:		3.86		R$ to U$
	Annual incomes =		452298		U$·yr-1
41	Selling ewes, U$
	Annual incomes =		(lambs sold)(avarege weight)(average price)
	ewes sold:		53
	avarage weight:		60		kg
	avarage price:		4.33		R$/kg
	Convertion factor:		3.86		R$ to U$
	Annual incomes =		53149.9		U$·yr-1
42	Selling rams, U$
	Annual incomes =		(lambs sold)(avarege weight)(average price)
	ewes sold:		1		nº ewes
	avarage weight:		120		kg
	avarage price:		20.33		real
	Convertion factor:		3.86		R$ to U$
	Annual incomes =		9416.86		U$·yr-1
43	Live lamb production, g
	Annual production =		(lambs sold)(average live weight)
	lambs sold:		343		nº lambs
	avarage weight:		38000		kg to g
	Annual production =		13034000		g·yr-1
44	Lamb meat production, J
	Annual energy =		(annual production*carcass yield)(kcal content/g)(4186J/Cal)
	Annual production =		6256320		g·yr-1
		Meat, lamb, half carcass, raw	116		kcal g-1									TBCA, 2021. http://www.tbca.net.br/
	Convertion factor:		4186		J/kcal
		Energy (J) =	3037918840320		J yr
