# Supplementary material
Source: MDPI journal article supplement (https://www.mdpi.com/2071-1050/13/21/11595)
Supplement: s1 [file s1 › Suplemmentary material S3.pdf]

## Supplementary Material C

**Table C: Representative property of the region São José do Rio Preto using no grains in lamb feed (simulation)**

i. Qualitative characteristics (no grain in lamb feed scenario)

| Characteristics                     | Description                                 |
|-------------------------------------|---------------------------------------------|
| Total property area                 | 220 ha                                      |
| Area used for sheep farming         | 15 ha                                       |
| Land price                          | R\$20,000.00/ha                             |
| Soil fertility                      | Medium                                      |
| Is sheep farming the only activity? | No                                          |
| Other activities developed          | Sugar cane                                  |
| Sheep farming time                  | 4 years                                     |
| Sheep farming administrator         | Owner                                       |
| Sheep farming time                  | 5 days/month                                |
| Technical aid                       | Yes, 1day/month                             |
| Number of employees registered      | 1                                           |
| Number of matrices                  | 300                                         |
| Number of sires                     | 3                                           |
| Traded lambs/year                   | 343                                         |
| Herd stabilization                  | Yes                                         |
| Male replacement                    | Male Dorper x female woolless               |
| Female replacement                  | Itself                                      |
| Male replacement                    | Purchase                                    |
| Steps taken in the cycle            | Full cycle                                  |
| Breeding system                     | Semi-finishing                              |
| Major station                       | Yes                                         |
| Pregnancy diagnosis                 | No                                          |
| Weaning procedure                   | Controlled breastfeeding                    |
| Type of animal facilities           | Recycling of dairy cattle ranches           |
| Type of troughs used                | Recycling for other materials               |
| Tractor availability                | Yes, 75 cv                                  |
| Implements and/or equipment         | Carriage, forage harvester, chopper         |
| Pastures                            |                                             |
| Type                                | Tifton 85                                   |
| farmed for sheep?                   | Yes                                         |
| Capacity                            | Need make the count                         |
| Does it rotate?                     | Yes                                         |
| Does it perform fertilization?      | Yes, limestone                              |
| Extra voluminous                    | Yes                                         |
| Type                                | Sugar cane                                  |
| Origin                              | Itself                                      |
| Concentrated                        | Yes                                         |
| Type                                | Formulated                                  |
| Origin                              | Purchased ingredients, made on the property |

## Supplementary Material C

**Table C: Representative property of the region São José do Rio Preto using no grains in lamb feed (simulation)**

- ii. Technical indicators of simulated sheep production system (no grain in lamb feed scenario)

| Technical indicators       | Scenario          |
|----------------------------|-------------------|
| Pregnancy rate (%)         | 85                |
| Prolificacy rate (%)       | 140               |
| Lambing interval (months)  | 11                |
| Birth weight (kg)          | 4                 |
| Weaning age (days)         | 60                |
| Weaning weight (kg)        | 20                |
| Pre weaning ADG (kg/day)   | 0.267             |
| Pre weaning mortality (%)  | 12                |
| Finishing days             | 120 <sup>a</sup>  |
| Post weaning ADG (kg/day)  | 0.07 <sup>a</sup> |
| Slaughter live weight (kg) | 28.4 <sup>a</sup> |
| Slaughter age (days)       | 180 <sup>a</sup>  |
| Carcass yield (%)          | 48                |

<sup>a</sup>Values obtained from Galina et al. (2007);

- iii. Scheme adopted for allocation of sheep production costs (no grain in lamb feed scenario)

| A. VARIABLE COST                  | Scenario 2       |                  |
|-----------------------------------|------------------|------------------|
| <i>Feed</i>                       | R\$              | US\$             |
| <u><i>Lamb</i></u>                |                  |                  |
| Mineral salt                      | 1,760.68         | 454.96           |
| Sugar cane silage                 | 20,277.59        | 5,239.69         |
| Soybean Meal                      | -                | -                |
| Ground Corn                       | -                | -                |
| <u><i>Ewes</i></u>                |                  |                  |
| Mineral salt                      | 6,522.22         | 1,685.33         |
| Forages                           | 25,575.21        | 6,608.58         |
| Sugar cane silage                 | 7,101.58         | 1,835.03         |
| Soybean Meal                      | 6,643.84         | 1,716.75         |
| Ground Corn                       | 2,533.09         | 654.55           |
| <u><i>Ram</i></u>                 |                  |                  |
| Mineral salt                      | 81.53            | 21.07            |
| Forages                           | 505.14           | 130.53           |
| Sugar cane silage                 | 117.08           | 30.25            |
| <i>Subtotal - Feed</i>            | <i>71,117.96</i> | <i>18,376.74</i> |
| <u><i>Veterinary expenses</i></u> |                  |                  |
| <u><i>Lamb</i></u>                |                  |                  |
| Anthelmintic                      | 37.39            | 9.66             |

## Supplementary Material C

**Table C: Representative property of the region São José do Rio Preto using no grains  
in lamb feed (simulation)**

|                                            |                  |                  |
|--------------------------------------------|------------------|------------------|
| Vaccines                                   | 957.12           | 247.32           |
| <u>Ewes</u>                                |                  |                  |
| Anthelmintic                               | 98.18            | 25.37            |
| Vaccines                                   | 418.91           | 108.25           |
| <u>Ram</u>                                 |                  |                  |
| Anthelmintic                               | 1.96             | 0.51             |
| Vaccines                                   | 4.19             | 1.08             |
| <i>Subtotal - Veterinary expenses</i>      | 1,517.75         | 392.19           |
| <b><i>SUBTOTAL - VARIABLE COSTS</i></b>    | <b>72,635.71</b> | <b>18,768.93</b> |
| <hr/>                                      |                  |                  |
| <b>B. FIXED OPERATING COSTS</b>            |                  |                  |
| <b>Manpower</b>                            |                  |                  |
| <hr/>                                      |                  |                  |
| Fixes                                      | 9,120.00         | 2,356.59         |
| Wage workers                               | 10,200.00        | 2,635.66         |
| Social charges                             | 200.00           | 51.68            |
| Services (Technical assistance)            | 180.00           | 46.51            |
| <i>Subtotal - Manpower</i>                 | 19,700.00        | 5,090.44         |
| <hr/>                                      |                  |                  |
| <b>Energy and fuels</b>                    |                  |                  |
| Fuel (except pasture maintenance)          | 404.40           | 104.50           |
| Electricity                                | 1,224.00         | 316.28           |
| <i>Subtotal - Energy and fuels</i>         | 1,628.40         | 420.78           |
| <hr/>                                      |                  |                  |
| <b>Depreciations</b>                       |                  |                  |
| Housing                                    | 2,325.59         | 600.93           |
| Purchased rams                             | 197.92           | 51.14            |
| Tractor                                    | 327.93           | 84.74            |
| 4-wheel trailer                            | 236.18           | 61.03            |
| Forage Harvester                           | 310.07           | 80.12            |
| Weighing machine                           | 33.91            | 8.76             |
| <i>Subtotal - Depreciations</i>            | 3,431.60         | 886.72           |
| <hr/>                                      |                  |                  |
| <b>Maintenance and conservation</b>        |                  |                  |
| <hr/>                                      |                  |                  |
| <u><i>Machinery and implements</i></u>     |                  |                  |
| Tractor                                    | 121.84           | 31.48            |
| 4-wheel trailer                            | 87.75            | 22.67            |
| Forage Harvester                           | 115.20           | 29.77            |
| <u><i>Facilities</i></u>                   | -                | -                |
| Housing                                    | 691.08           | 178.57           |
| Fences                                     | 378.00           | 97.67            |
| <u><i>Pastures</i></u>                     | -                | -                |
| Limestone                                  | 10,275.00        | 2,655.04         |
| fertilizers                                | 2,000.00         | 516.80           |
| <i>Subtotal - Machinery and implements</i> | 13,668.87        | 3,532.00         |
| <hr/>                                      |                  |                  |
| <b>Others fixed costs</b>                  |                  |                  |
| Taxes charges                              | 400.00           | 103.36           |
| <i>Subtotal - Others fixed costs</i>       | 400.00           | 103.36           |

## Supplementary Material C

**Table C: Representative property of the region São José do Rio Preto using no grains in lamb feed (simulation)**

|                                                |                          |                         |
|------------------------------------------------|--------------------------|-------------------------|
| <i><u>SUBTOTAL - FIXED OPERATING COSTS</u></i> | <i><u>38,828.87</u></i>  | <i><u>10,033.30</u></i> |
| C. OPERATING COST (A + B)                      |                          |                         |
| <i><u>SUBTOTAL - OPERATING COST</u></i>        | <i><u>111,464.58</u></i> | <i><u>28,802.23</u></i> |
| D. INCOME OF FACTORS                           |                          |                         |
| Remuneration on variable capital               | 1,146.74                 | 296.31                  |
| Remuneration on fixed capital (except land)    | 613.01                   | 158.40                  |
| Land (opportunity cost of lease)               | 4,460.34                 | 1,152.54                |
| <i><u>Subtotal - Income of factors</u></i>     | <i><u>6,220.09</u></i>   | <i><u>1,607.26</u></i>  |
| E. TOTAL COST (C + D)                          | 117,684.67               | 30,409.49               |

The rate of change in carrying out this study was R\$ 3.87 per US\$ 1.00

## References

- Galina, M.A., Guerrero, M., Puga, C.D., 2007. Fattening Pelibuey lambs with sugar cane tops and corn complemented with or without slow intake urea supplement. *Small Rumin. Res.* 70, 101–109. <https://doi.org/10.1016/j.smallrumres.2006.01.014>
- ICPC - Índice de Custo de Produção do Cordeiro Paulista, 2019. Informativo mensal do índice de custo de produção do cordeiro paulista. Available at. <https://www.lae-fmvz-usp.com/informativos-mensais>. Access in: 11 nov. 2019.
- Raineri, C., Nunes, B.C.P., Gameiro, A.H., 2015a. Technological characterization of sheep production systems in Brazil. *Anim. Sci. J.* 86, 476–485. <https://doi.org/10.1111/asj.12313>.
- Raineri, C., Stivari, T.S.S., Gameiro, A.H., 2015b. Development of a cost calculation model and cost index for sheep production. *Rev. Bras. Zootec.* 44, 443–455. <https://doi.org/10.1590/S1806-92902015001200005>.
